# Supplementary material for: Synthesis, Antimicrobial and Hypoglycemic Activities of Novel N-(1-Adamantyl)carbothioamide Derivatives
Source: MDPI journal article supplement (doi:10.3390/molecules20058125), 2015-05-06
Supplement: s1 [file s1]

# Supplementary Materials

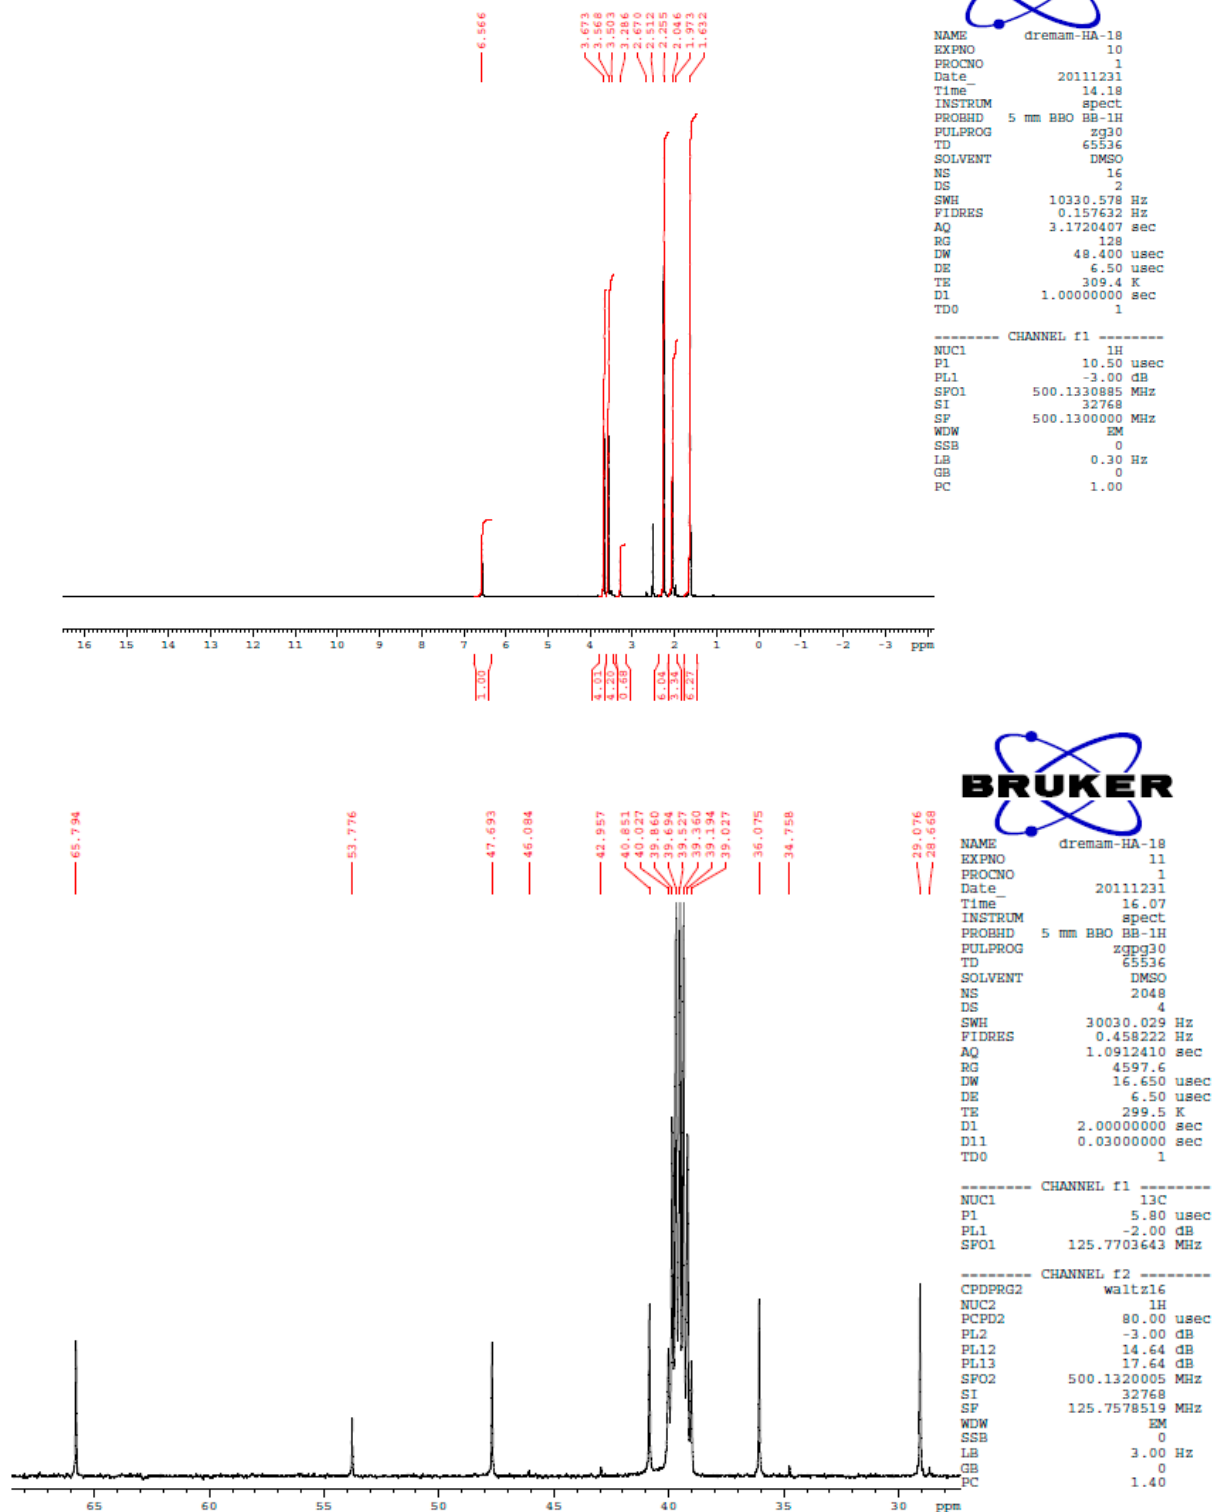

Figure S1. <sup>1</sup>H-NMR Spectrum of Compound 6.

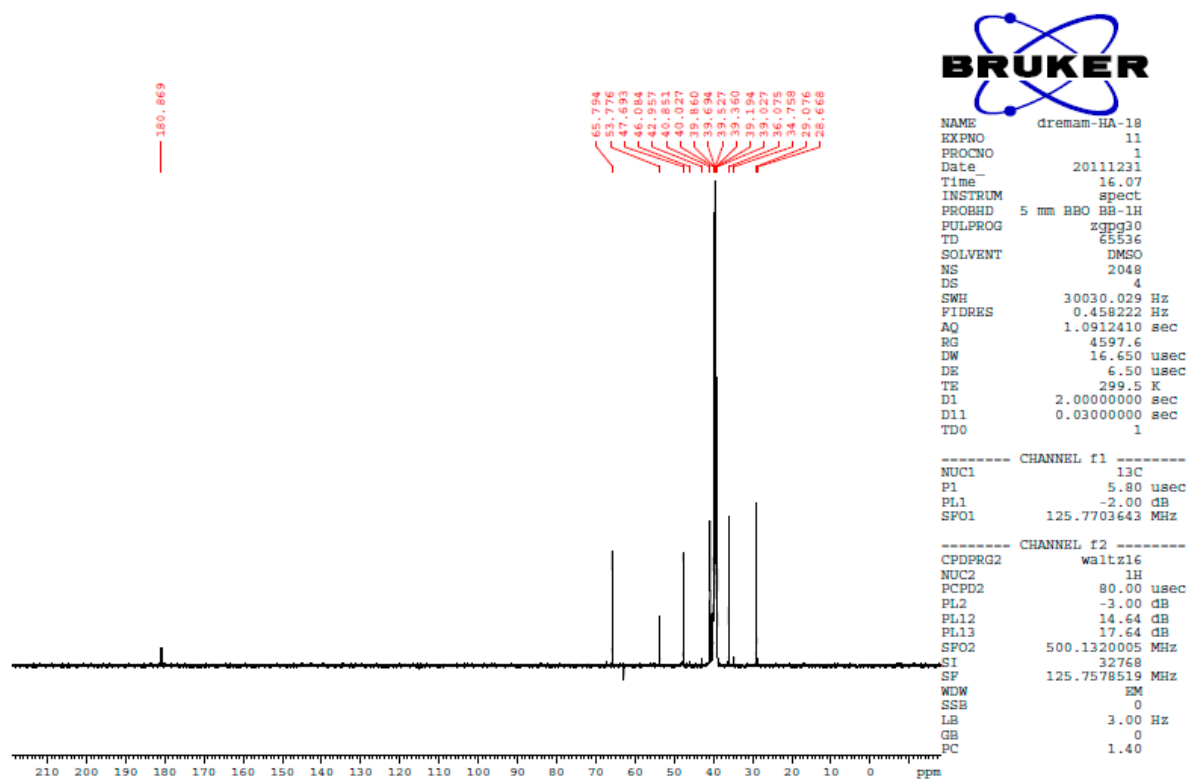

3BO DMSO D:\ \ mmj

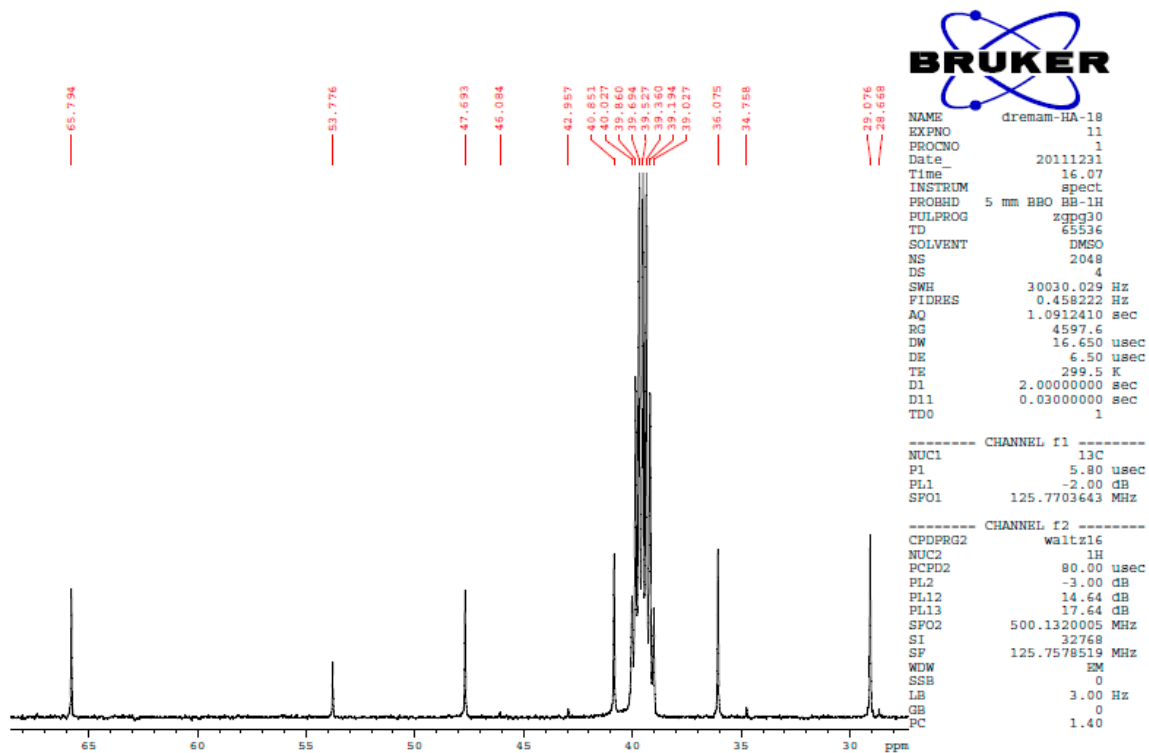

Figure S2.  $^{13}\text{C}$ -NMR Spectrum of Compound 6.

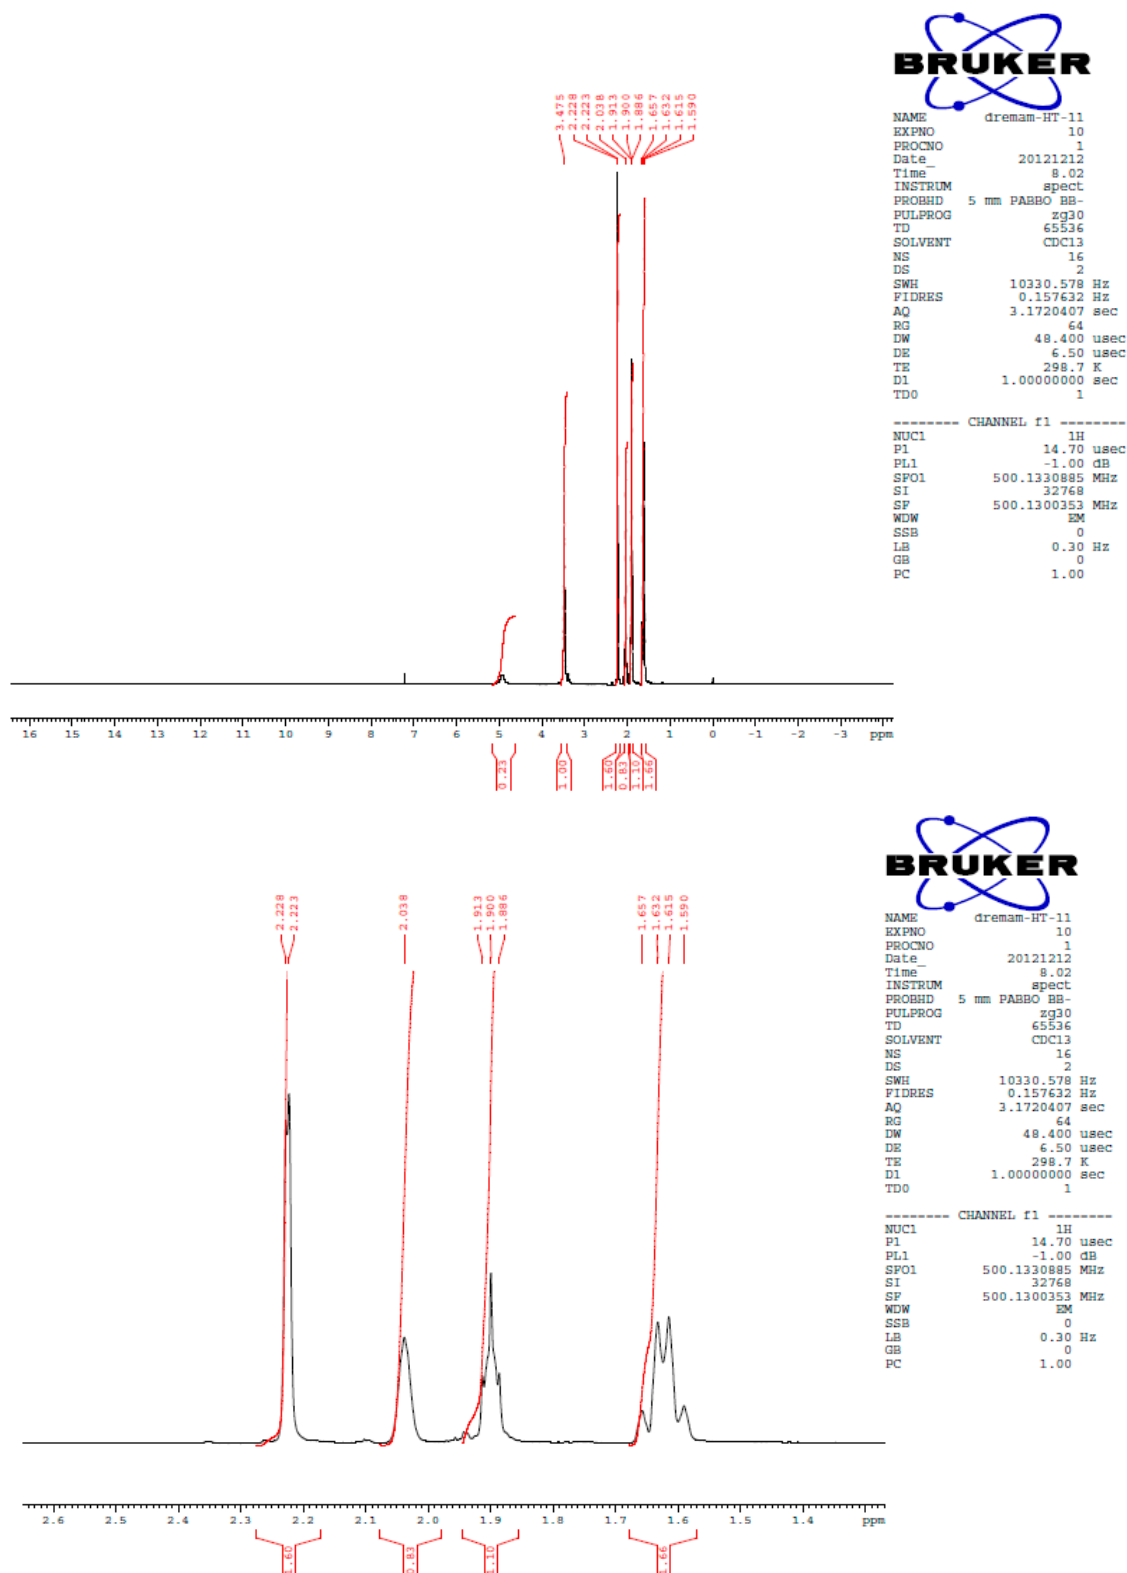

Figure S3.  $^1\text{H}$ -NMR Spectrum of Compound 7.

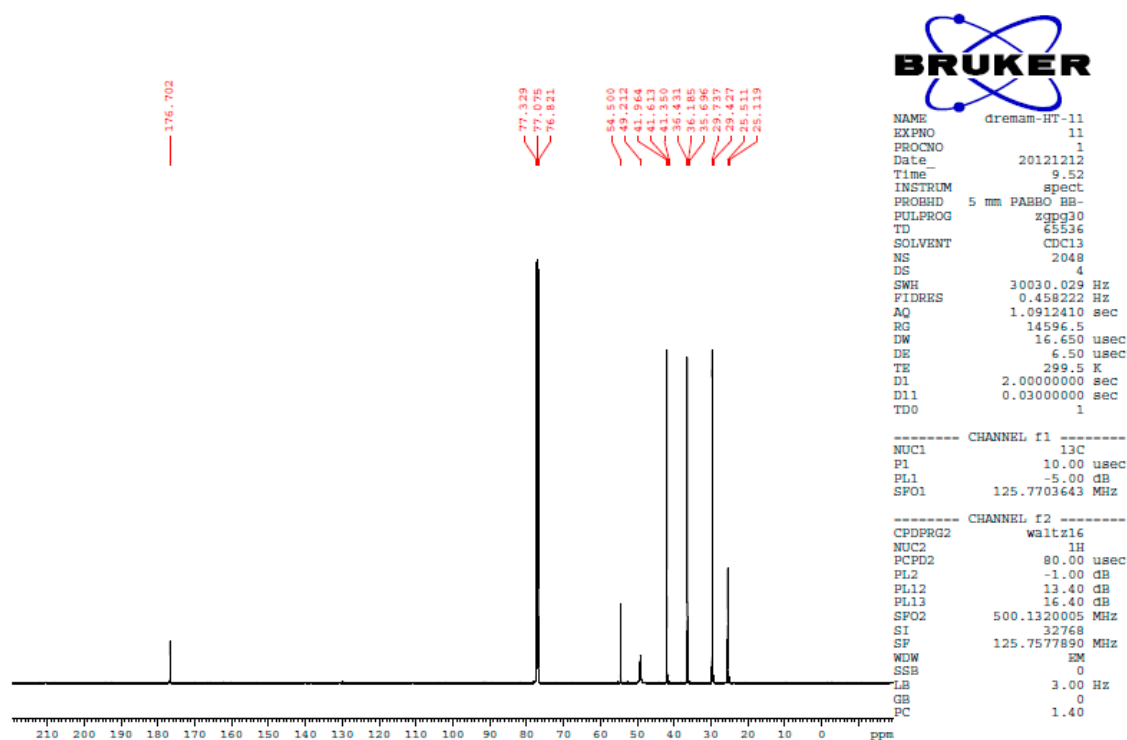Figure S4.  $^{13}\text{C}$ -NMR Spectrum of Compound 7.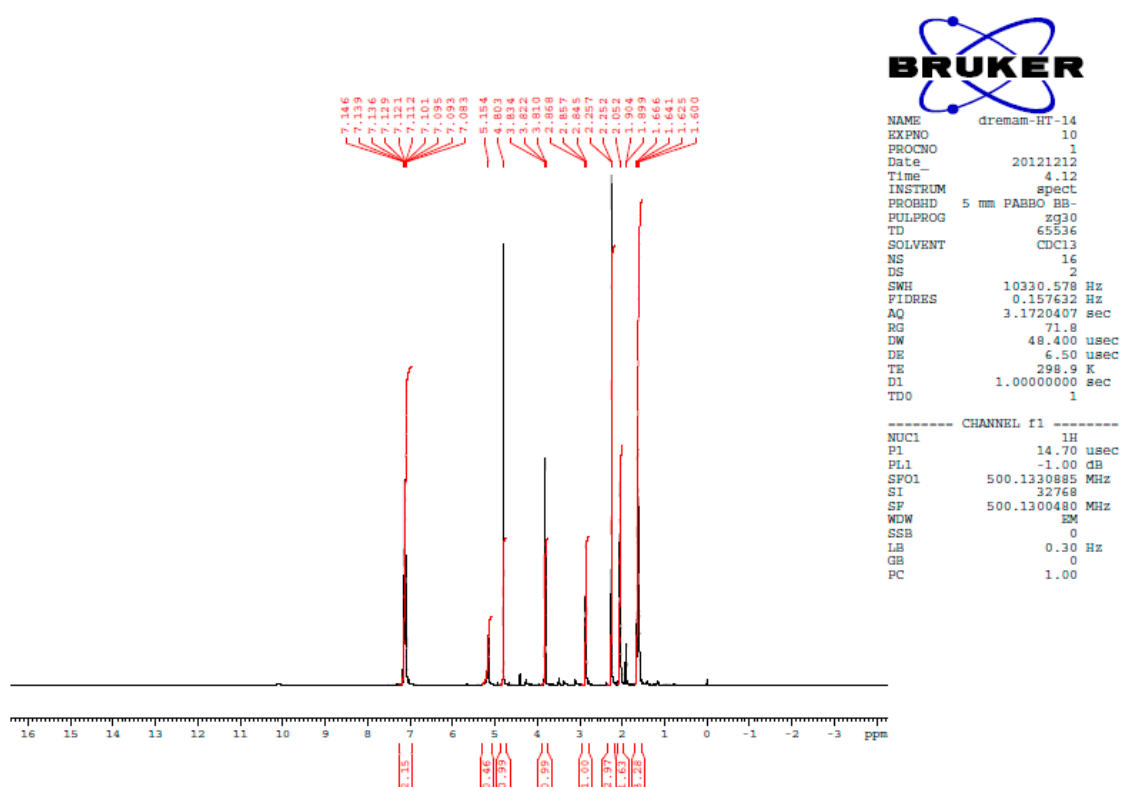

Figure S5. Cont.

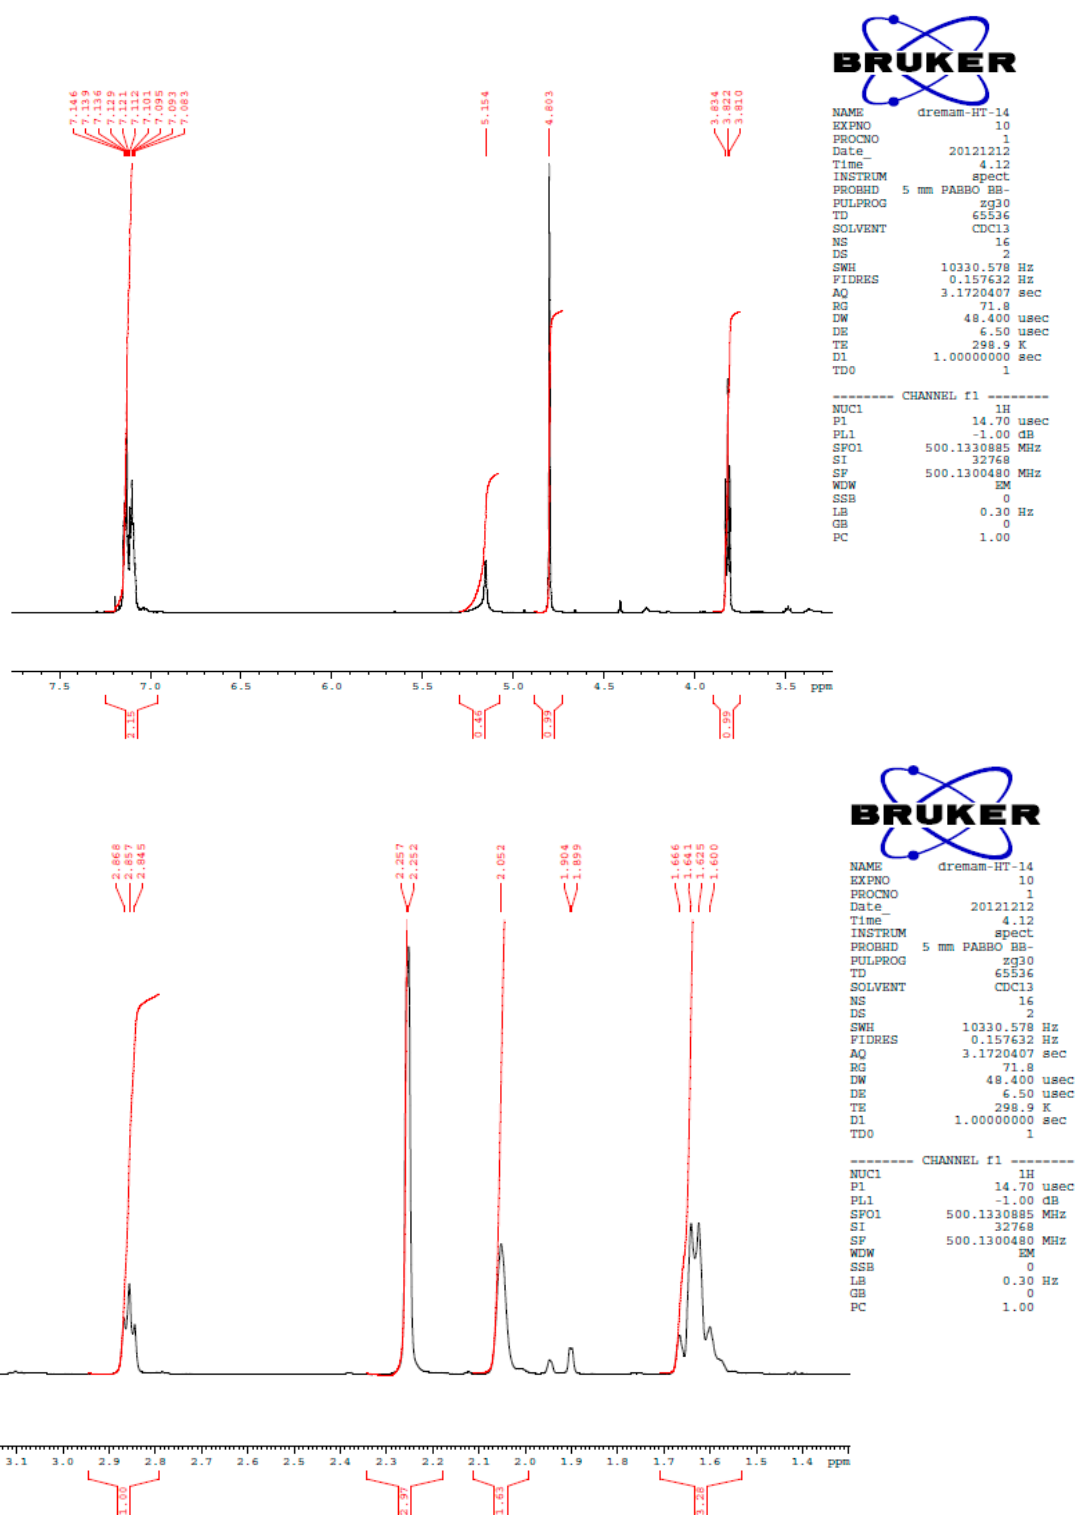

**Figure S5.**  $^1\text{H}$ -NMR Spectrum of Compound **9**.

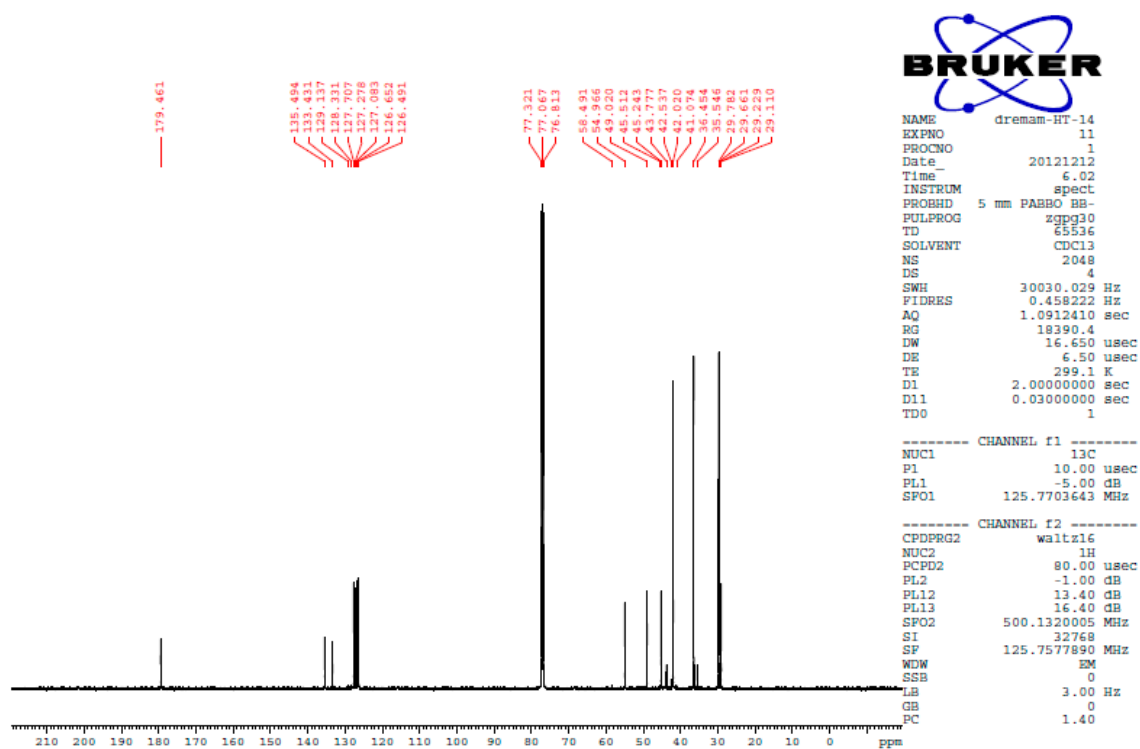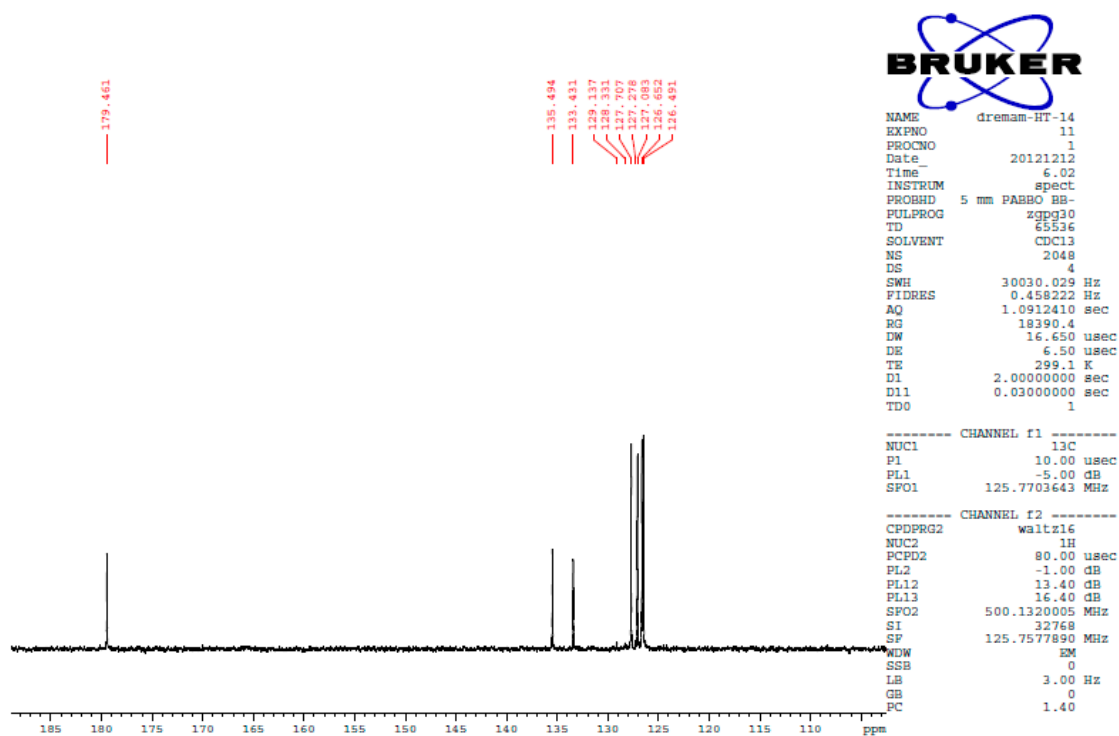

Figure S6. Cont.

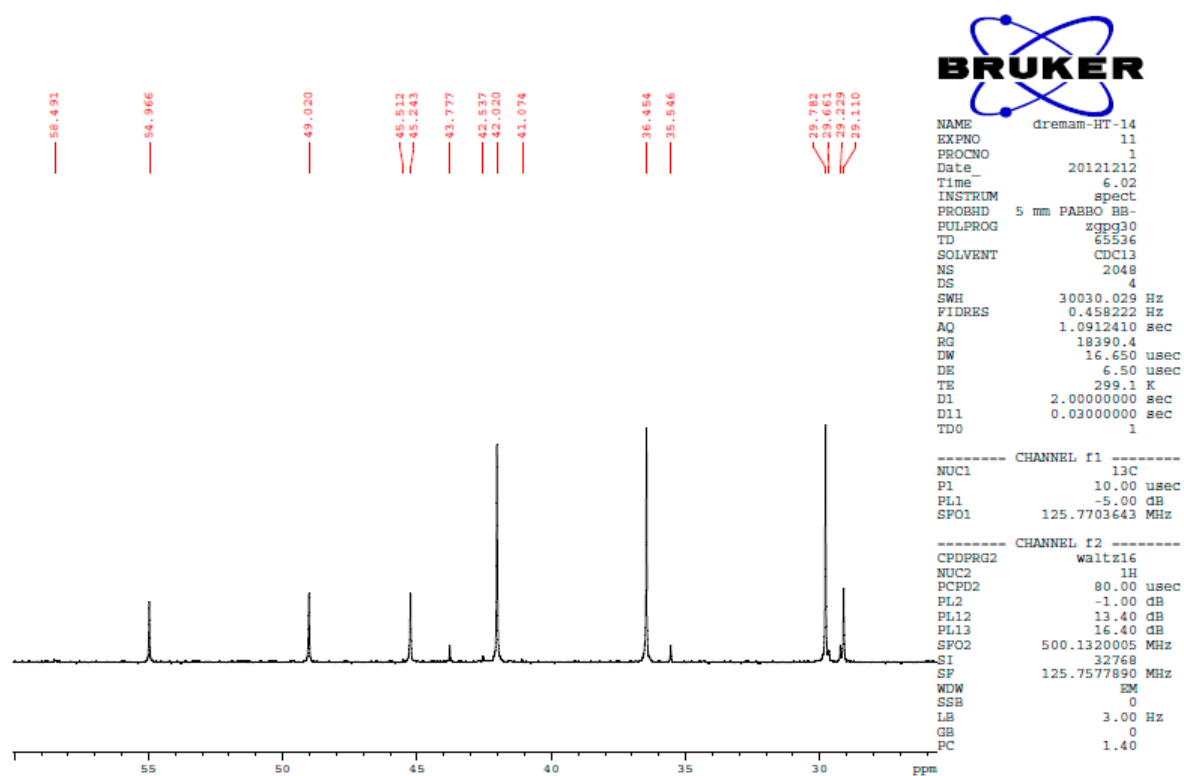

**Figure S6.**  $^{13}\text{C}$ -NMR Spectrum of Compound **9**.
